# Supplementary material for: Application of multiplet structure deconvolution to extract scalar coupling constants from 1D NMR spectra
Source: Copernicus journal article supplement (doi:10.5194/mr-2021-32), 2021-03-31

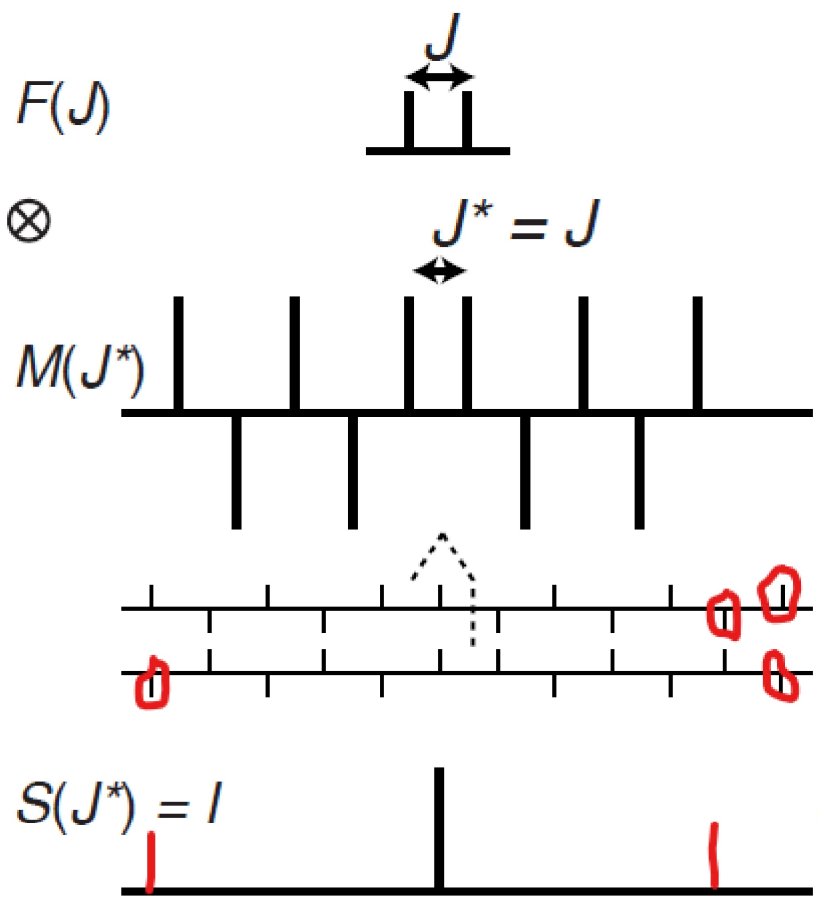

Supplement: Supplementary file [file mr-2021-32-RC1-supplement.pdf]
